# Supplementary material
Source: Elsevier journal article supplement (https://www.sciencedirect.com/science/article/pii/S0212656716304474)
Supplement: mmc1 [file S0212656716304474:mmc1.docx]

**Instructivo para la entrevista telefónica a pacientes**

1. Modelo de discurso para la entrevista telefónica:

*Buenas tardes. Estoy llamando del Hospital Italiano de Buenos Aires quería saber si se encuentra la/el Sra/Sr. …. Mi nombre es .…*

*Somos médicos y estudiantes de medicina del Hospital Italiano y del Instituto Universitario.*

*Estamos realizando un estudio de investigación para mejorar los cuidados de salud en los pacientes que se atienden en el hospital y para eso quería hacerle algunas preguntas. La entrevista no va a llevar más de cinco minutos e incluye preguntas sobre la medicación que usa. Toda la información que obtengamos va a ser manejada en forma confidencial y no va a implicar ningún cambio en su atención habitual en nuestra institución.*

*Esta encuesta es totalmente voluntaria, ¿aceptaría que le haga algunas preguntas?.*

*1. Figura en la Historia Clínica que uno de los médicos del Hospital le indicó/recomendó a usted comenzar a “tomar” XXX por su diabetes/fractura de cadera en XXX fecha. Estuvimos mirando nuestros registros de la farmacia del Hospital y figura que hasta XXX todavía usted no lo había pasado a buscar ni había pedido que se lo mandaran a su casa. ¿Coincide lo que usted se acuerda con esto que le acabamos de decir?*

*2. En el caso de responder que usted está de acuerdo con lo que figura en nuestro registro le queremos preguntar. ¿Porque no retiro el medicamento ni pidió que se lo manden por el sistema de reparto o delivery a su domicilio? Le voy a nombrar varias opciones. Por favor, dígame cuál representa mejor lo que ocurrió.*

*a- No sabía o no le había quedado claro que durante “mes de año” ya tenía que comenzar a tomar ese remedio.*

*b- Le tiene o le tenía miedo a algún efecto adverso o a alguna contraindicación del medicamento.*

*c- En ese momento pensó que no hacía falta que lo tomara.*

*d- En ese momento no le alcanzaba el dinero para comprarlo.*

*e- Lo consiguió en la farmacia del Hospital Italiano pero pasado el mes de le habían recomendado comenzar a tomarlo.*

*f- Otras causas…*

*3. Entonces entiendo que Usted sí consiguió el medicamento antes de Fecha XXX*

*En ese caso quisiera preguntarle ¿Donde consiguió el medicamento?*

*a- Lo consiguió en la farmacia del Hospital Italiano antes del mes de que el médico le recomendara comenzar a tomarlo.*

*b- Lo consiguió en una farmacia que está fuera del Sistema de Farmacias del Hospital Italiano antes de que pasara un mes desde el día en que el médico me había recomendado comenzar a tomarlo.*

*c- No hizo falta que lo pidiera al Sistema de Farmacias del HIBA ya que consiguió por otro medio (ej. un médico o alguien de un laboratorio le regalo muestras gratis u otra persona le dio algunos que no está usando).*

*d- Otras formas de conseguir la medicación….*

*¡Ya terminamos la encuesta! Le agradecemos enormemente haber estado dispuesto a contestarla.*

*Si quisiera corroborar que la estamos llamando del Hospital Italiano le dejo un número telefónico: 4959-0200 interno: 9263* (es el interno de la sala de residentes).
